# Supplementary material for: lncRNA-MFDL: identification of human long non-coding RNAs by fusing multiple features and using deep learning
Source: Royal Society of Chemistry journal article supplement (doi:10.1039/c4mb00650j), 2015-01-06
Supplement: c4mb00650j2.pdf [file c4mb00650j2.pdf]

Table S1. Training and testing datasets

|                   | species      | source       | Number of lncRNAs | Number of mRNAs |
|-------------------|--------------|--------------|-------------------|-----------------|
| Training datasets | Human        | Gencode.v19  | 10,000            | NA              |
|                   | Human        | Refseq       | NA                | 10,000          |
| Testing datasets  | Human        | Gencode.v19  | 13,529            | NA              |
|                   | Human        | Refseq       | NA                | 13,529          |
|                   | Gorilla      | Ensemble.v76 | 367               | 350             |
|                   | Macaque      | Ensemble.v76 | 358               | 350             |
|                   | Orangutan    | Ensemble.v76 | 380               | 400             |
|                   | Mouse        | Ensemble.v76 | 500               | 500             |
|                   | Xenopus      | Ensemble.v76 | 94                | 100             |
|                   | Anole lizard | Ensemble.v76 | 275               | 300             |
|                   | Chicken      | Ensemble.v76 | 43                | 50              |
|                   | Zebrafish    | Ensemble.v76 | 500               | 500             |
|                   | Lamprey      | Ensemble.v76 | 54                | 50              |
|                   | C. elegans   | Ensemble.v76 | 500               | 500             |
